# Supplementary material for: ACKR2 in hematopoietic precursors as a checkpoint of neutrophil release and anti-metastatic activity
Source: PubMed Central journal article supplement (PMC5813042; doi:10.1038/s41467-018-03080-8), 2018-02-14
Supplement: 41467_2018_3080_MOESM1_ESM.pdf [file 41467_2018_3080_MOESM1_ESM.pdf]

**Supplementary material for:**

**ACKR2 IN HEMATOPOIETIC PRECURSORS AS A CHECKPOINT OF NEUTROPHIL  
RELEASE AND ANTIMETASTATIC ACTIVITY**

Matteo Massara<sup>1,2,†</sup>, Ornella Bonavita<sup>1,2,†</sup>, Benedetta Savino<sup>1,2,†</sup>, Nicoletta Caronni<sup>1,2,†</sup>,  
Valeria Mollica Poeta<sup>1,3</sup>, Marina Sironi<sup>1</sup>, Elisa Setten<sup>1,2</sup>, Camilla Recordati<sup>4</sup>, Laura  
Crisafulli<sup>1,5</sup>, Francesca Ficara<sup>1,5</sup>, Alberto Mantovani<sup>1,3,6</sup>, Massimo Locati<sup>1,2</sup>, Raffaella  
Bonecchi<sup>1,3\*</sup>

<sup>1</sup>Humanitas Clinical and Research Center, via Manzoni 56, 20089, Rozzano (MI), Italy;

<sup>2</sup>Department of Medical Biotechnologies and Translational Medicine, Università degli Studi  
di Milano, Via Fratelli Cervi, 93, 20090 Segrate (MI), Italy; <sup>3</sup>Department of Biomedical  
Sciences, Humanitas University, Via Rita Levi Montalcini, 20090, Pieve Emanuele (MI),  
Italy; <sup>4</sup>Fondazione Filarete, viale Ortles 22/4, 20139, Milano, Italy; <sup>5</sup>Milan Unit, Istituto di  
Ricerca Genetica e Biomedica, CNR, via Manzoni 56, 20089 Rozzano (MI); <sup>6</sup> The William  
Harvey Research Institute, Queen Mary University of London, Charterhouse Square,  
London EC1M 6BQ, UK.

† = these authors equally contributed

**\* Corresponding author:**

Raffaella Bonecchi

Humanitas Clinical and Research Center

Humanitas University

Via Manzoni 113

20089 Rozzano, Italy

Tel +39.02.8224.5117

E-mail: [raffaella.bonecchi@humanitasresearch.it](mailto:raffaella.bonecchi@humanitasresearch.it)

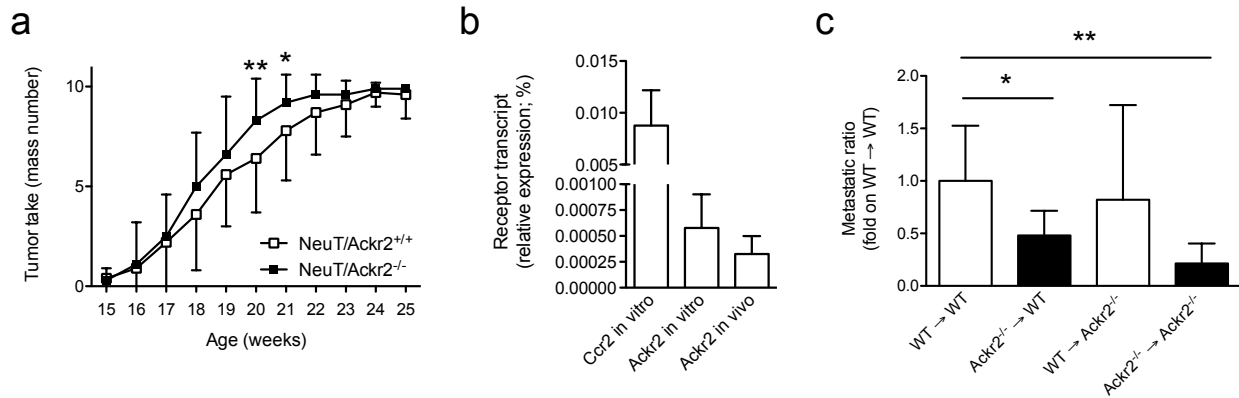

**Supplementary Figure 1: Metastasis protection is given by lack of ACKR2 by hematopoietic cells.**

a) *NeuT/Ackr2*<sup>+/+</sup> (white squares) and *NeuT/Ackr2*<sup>-/-</sup> (black squares) mice were evaluated for tumor take calculated as described in the Materials and Methods section (n = 42 for *NeuT/Ackr2*<sup>+/+</sup> and 23 for *NeuT/Ackr2*<sup>-/-</sup> mice, respectively) b) qPCR analysis of *Ackr2* and *Ccr2* expression by 4T1 cells in vitro and sorted from a tumor mass after 21 days from injection as CD45<sup>-</sup>/CD31<sup>-</sup>/Podoplanin<sup>-</sup>. Data are relative to *β-actin* expression (n = 4 for in vitro cancer cell expression and n = 3 WT mice for in vivo cancer cell expression). c) Metastatic ratio of WT and *Ackr2*<sup>-/-</sup> mice reconstituted with either WT (white columns) or *Ackr2*<sup>-/-</sup> BM (black columns) after 28 days from orthotopic 4T1 injection calculated as described in the Materials and Methods section (n = 6 for WT and 4 for *Ackr2*<sup>-/-</sup> recipient mice, respectively). Data are represented as mean (SD). p value was generated using the unpaired t test. \* = p < 0.05, \*\* = p < 0.01, \*\*\* = p < 0.001.

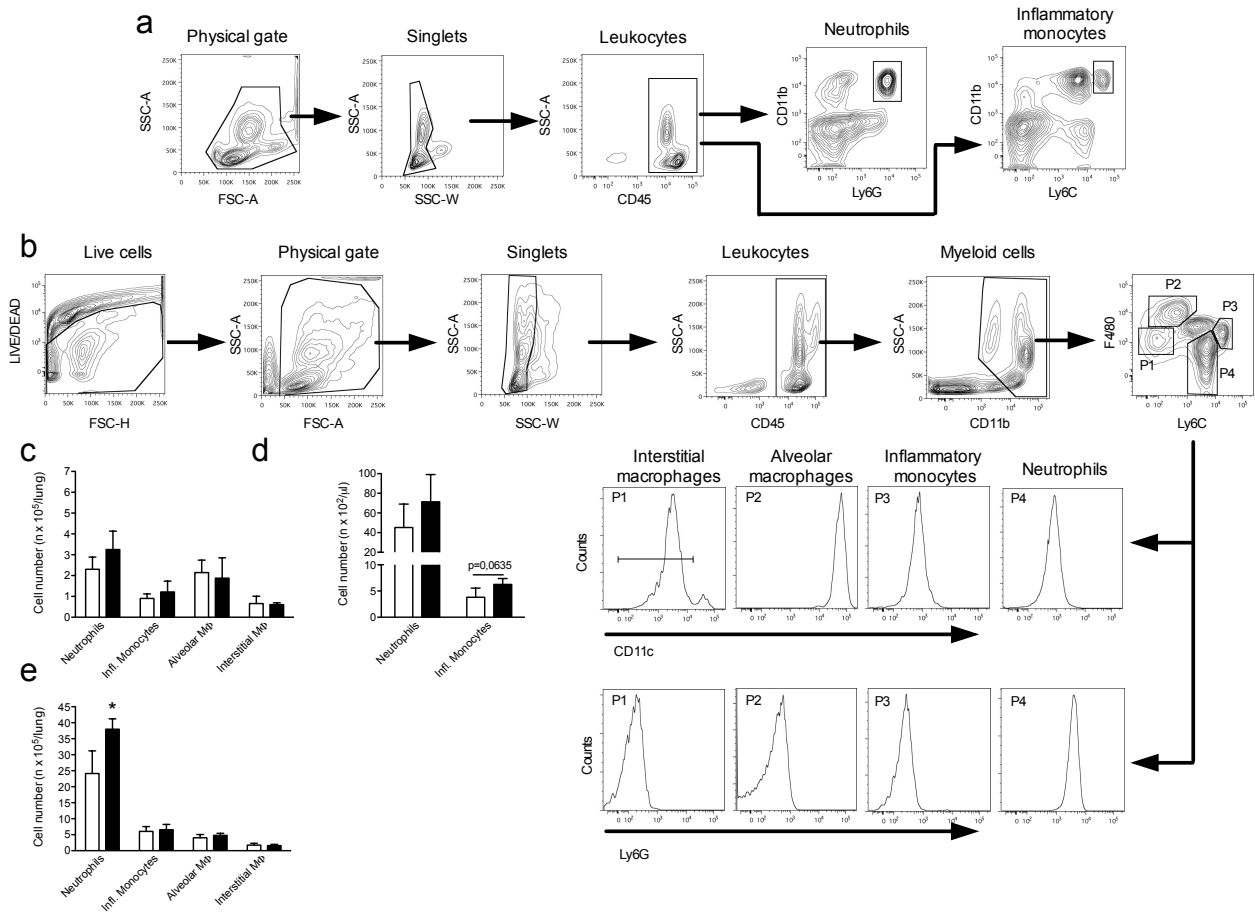

## Supplementary Figure 2: Gating strategy for the identification of blood and lung neutrophils and monocytes

a) Gating strategy to identify circulating neutrophils (CD45<sup>+</sup>/CD11b<sup>+</sup>/Ly6G<sup>+</sup>) and inflammatory monocytes (CD45<sup>+</sup>/CD11b<sup>+</sup>/Ly6C<sup>hi</sup>). b) Gating strategy for the identification of interstitial macrophages (P1; CD11b<sup>+</sup>/F4/80<sup>int</sup>/Ly6C<sup>-</sup>/CD11c<sup>-</sup>/Ly6G<sup>-</sup>) alveolar macrophages (P2: CD11b<sup>low</sup>/F4/80<sup>hi</sup>/Ly6C<sup>int</sup>/CD11c<sup>+</sup>/Ly6G<sup>-</sup>), inflammatory monocytes (P3; CD11b<sup>+</sup>/F4/80<sup>int</sup>/Ly6C<sup>hi</sup>/CD11c<sup>-</sup>/Ly6G<sup>-</sup>), and neutrophils (P4; CD11b<sup>+</sup>/F4/80<sup>-</sup>/Ly6C<sup>int</sup>/CD11c<sup>-</sup>/Ly6G<sup>+</sup>) in the lungs of tumor-bearing mice. c) Absolute number of neutrophils, inflammatory monocytes, alveolar and infiltrating macrophages in WT (white columns) and *Akr2*<sup>-/-</sup> (black columns) lungs taken from unchallenged mice (n = 4 for WT and 6 for *Akr2*<sup>-/-</sup> mice, respectively). d) Absolute number of circulating neutrophils and inflammatory monocytes in WT (white columns) and *Akr2*<sup>-/-</sup> (black columns) mice and e) absolute number of neutrophils, inflammatory monocytes, alveolar and infiltrating macrophages in WT (white columns) and *Akr2*<sup>-/-</sup> (black columns) lungs 14 days after orthotopic injection of 4T1 cells (n = 4 for WT and 6 for *Akr2*<sup>-/-</sup> mice, respectively). Data are represented as mean (SD). p value was generated using the unpaired t test. \* = p < 0.05, \*\* = p < 0.01, \*\*\* = p < 0.001.

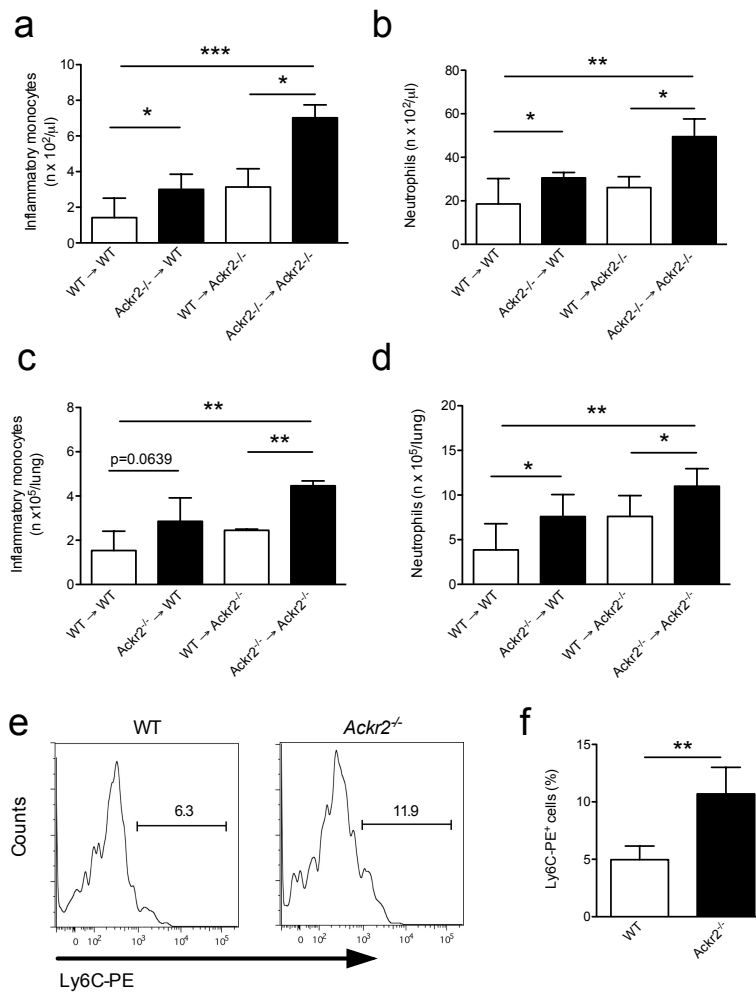

### Supplementary Figure 3: Hematopoietic expression of ACKR2 results in increased number of monocytes and neutrophils in blood and lungs

Absolute number of circulating inflammatory monocytes (a) and neutrophils (b) in the blood of Balb/c WT and *Ackr2*<sup>-/-</sup> mice reconstituted with either WT (white columns) or *Ackr2*<sup>-/-</sup> BM (black columns) after i.p. injection of CCL3L1 (n = 6 for WT and 4 for *Ackr2*<sup>-/-</sup> recipient mice, respectively). Absolute number of lung infiltrating inflammatory monocytes (c) and neutrophils (d) in WT and *Ackr2*<sup>-/-</sup> mice reconstituted with either WT (white columns) or *Ackr2*<sup>-/-</sup> BM (black columns) after i.p. injection of CCL3L1 (n = 6 for WT and 4 for *Ackr2*<sup>-/-</sup> recipient mice, respectively). e) Representative histograms of FACS analysis of BM WT and *Ackr2*<sup>-/-</sup> Ly6C-PE positive monocytes 1 h after i.p. injection of CCL3L1. Ly6C-PE antibody was injected i.v. 2 min before the end of the experiment. Negative gate was set on FMO control. f) Percentage of Ly6C-PE labelled cells (calculated on FMO samples) on total BM monocytes (CD45<sup>+</sup>/CD11b<sup>+</sup>/Gr1<sup>+</sup>/Ly6G<sup>-</sup>) (n = 4 for both WT and *Ackr2*<sup>-/-</sup> mice). Data are represented as mean (SD). p value was generated using the unpaired t test. \* = p < 0.05, \*\* = p < 0.01, \*\*\* = p < 0.001.

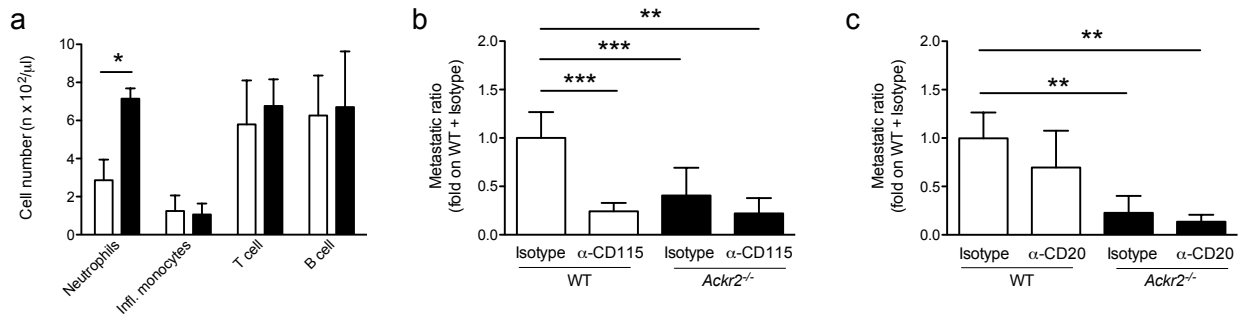

**Supplementary Figure 4: Monocyte and B cell depletions did not revert metastasis protection in *Ackr2*<sup>-/-</sup> mice**

a) Absolute number of circulating neutrophils, inflammatory monocytes, T cells and B cells in the blood of WT and *Ackr2*<sup>-/-</sup> mice 10 days after i.v. injection with B16F10 cells (n = 5 for both WT and *Ackr2*<sup>-/-</sup> mice). b – c) Metastatic ratio in WT and *Ackr2*<sup>-/-</sup> mice depleted for monocytes with α-CD115 (b) (n = 5 for WT/Isotype, *Ackr2*<sup>-/-</sup>/Isotype and *Ackr2*<sup>-/-</sup>/α-CD115 and 6 for WT/α-CD115) and B cells with α-CD20 (c) (n = 4 for WT/Isotype, 6 for WT/α-CD20, 3 for *Ackr2*<sup>-/-</sup>/Isotype, 3 for *Ackr2*<sup>-/-</sup>/α-CD20) 10 days after i.v. injection of B16F10 cells. Data are represented as mean (SD). p value was generated using the unpaired t test. \* = p < 0.05, \*\* = p < 0.01, \*\*\* = p < 0.001.

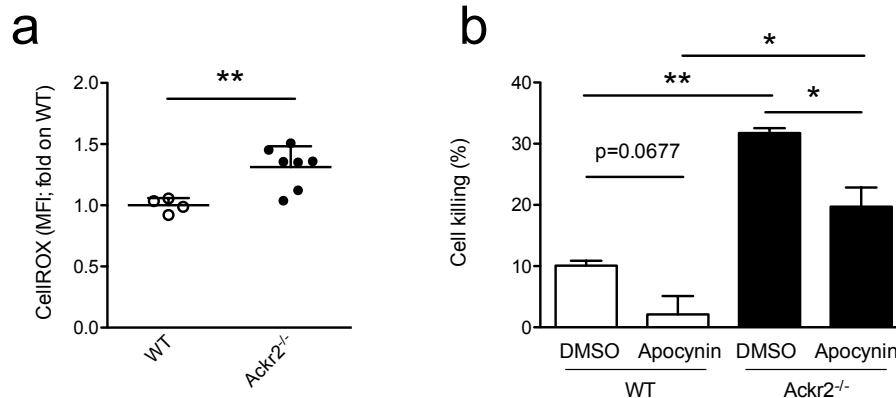

**Supplementary Figure 5: *Ackr2*<sup>-/-</sup> neutrophils show increased cell killing activity**

a) MFI of CellROX emission by WT and *Ackr2*<sup>-/-</sup> neutrophils. Data are normalized on MFI of WT neutrophils (n = 4 for WT and 7 for *Ackr2*<sup>-/-</sup>). b) 4T1-luc cells killing by magnetically sorted BM neutrophils taken from unchallenged WT (white columns) and *Ackr2*<sup>-/-</sup> (black columns) mice. Where indicated Apocynin (100  $\mu$ M) was added (n = 3 for both WT and *Ackr2*<sup>-/-</sup>, two independent experiments). Data are represented as mean (SD). p value was generated using the unpaired t test. \* = p < 0.05, \*\* = p < 0.01, \*\*\* = p < 0.001.

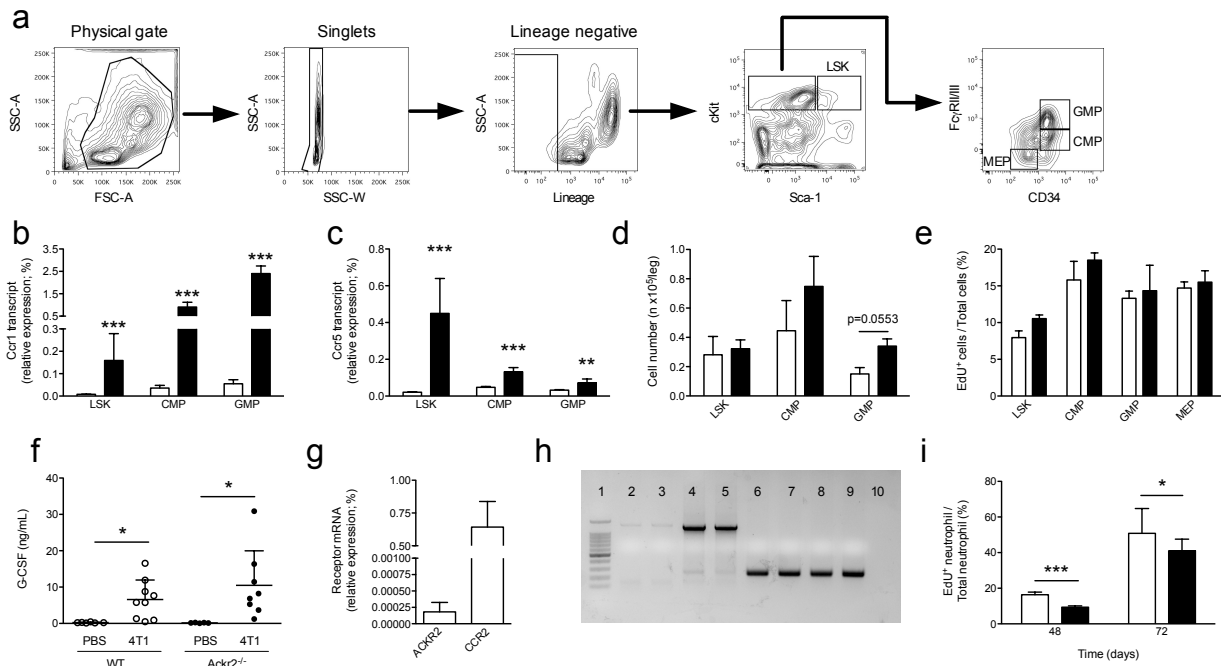

### Supplementary Figure 6: HPCs in the BM of WT and *Ackr2*<sup>-/-</sup> mice and *Ackr2* expression in mock and *Ackr2* transfected HL-60 cells

a) Gating strategy for the identification of LSK, GMP, CMP and MEP in the BM. qPCR analysis of the expression of *Ccr1* (b) and *Ccr5* (c) on sorted HPCs taken from the BM of WT (white columns) and *Ackr2*<sup>-/-</sup> (black columns) mice. All qPCR data are relative to  $\beta$ -actin expression (n = 7 for both WT and *Ackr2*<sup>-/-</sup> mice). D) Absolute number of HPCs in the BM of WT and *Ackr2*<sup>-/-</sup> mice calculated by FACS analysis (n = 6 for both WT and *Ackr2*<sup>-/-</sup> mice). e) Percentage of proliferating hematopoietic progenitors measured by FACS as EdU<sup>+</sup> cells. Gate was set on negative control (n = 3 for both WT and *Ackr2*<sup>-/-</sup> mice). f) Serum levels of G-CSF in WT and *Ackr2*<sup>-/-</sup> mice taken from mice 21 days after orthotopic injection with 4T1 cells or PBS (n = 6 for WT/PBS, 9 for WT/4T1, 5 for *Ackr2*<sup>-/-</sup>/PBS, 8 for *Ackr2*<sup>-/-</sup>/4T1). g) qPCR analysis of the expression of ACKR2 and CCR2 in HL-60 cells. Data are normalized on  $\beta$ -actin expression. h) RT-PCR analysis of ACKR2 (lanes 2-5) and GAPDH (lanes 6-9) expression on mock (lanes 2,3,6,7) and ACKR2 transfected (lanes 4,5,8,9) HL-60 cells. Lane 10 shows the negative control. i) Percentage of EdU<sup>+</sup> neutrophils on total neutrophils measured by FACS analysis after 48 and 78 hours from EdU injection. Gate was set on negative control (n = 6 for WT mice, 5 for *Ackr2*<sup>-/-</sup> mice). Data are represented as mean (SD). p value was generated using the unpaired t test. \* = p < 0.05, \*\* = p < 0.01, \*\*\* = p < 0.001.

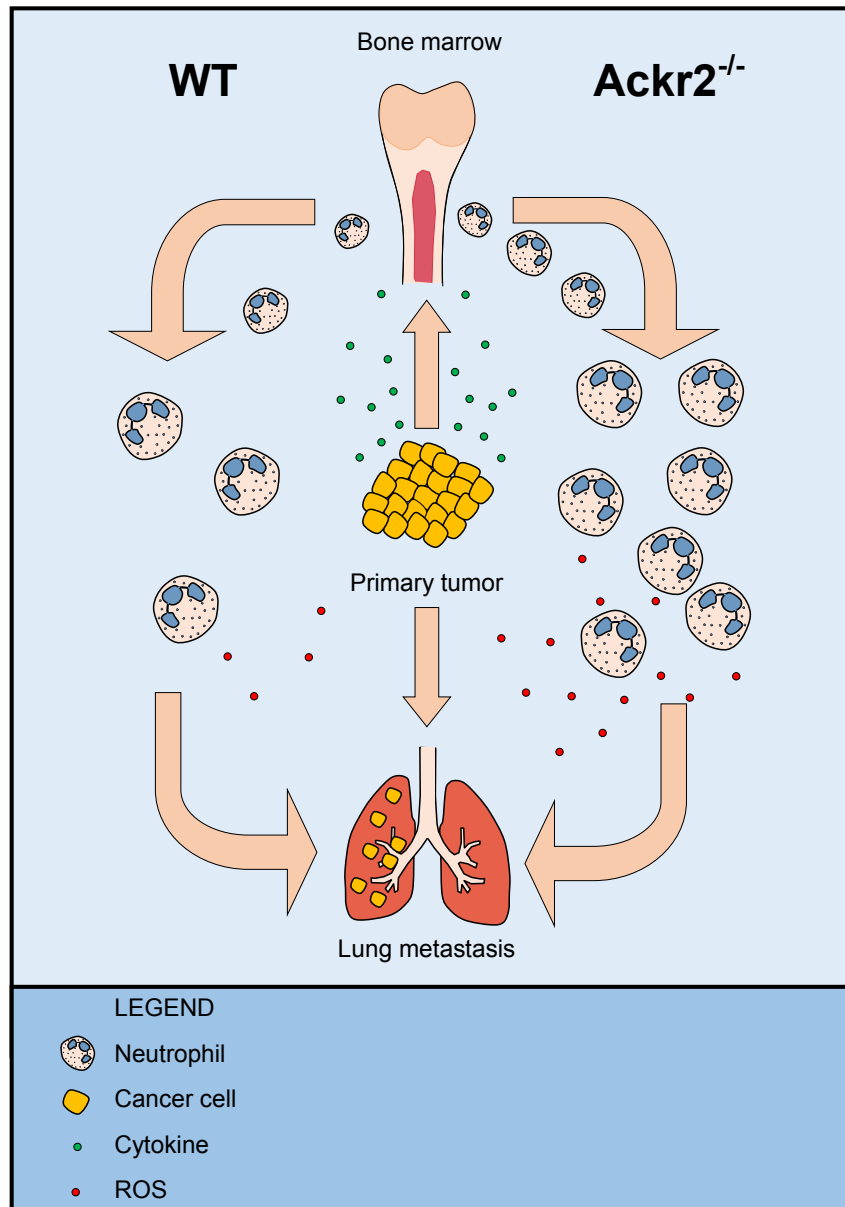

**Supplementary Figure 7:** ACKR2 inhibits the release of anti-metastatic neutrophils. ACKR2 activity in HPCs inhibits the expression of CC chemokine receptors, thus limiting the mobilization and maturation of neutrophils. Neutrophils released from the BM in *Ackr2*<sup>-/-</sup> mice have increased tumor killing ability.



**Supplementary Table 1: List of antibodies.**

| <b>Antigen</b>      | <b>Fluorochrome</b> | <b>Clone</b>                                       | <b>Supplier</b>       | <b>Catalog #</b> | <b>Working dilution</b> |
|---------------------|---------------------|----------------------------------------------------|-----------------------|------------------|-------------------------|
| CD45                | PerCP               | 30-F11                                             | Biolegend             | 103130           | 1:50                    |
| CD45                | V450                | 30-F11                                             | BD Bioscience         | 560501           | 1:50                    |
| CD45                | BV605               | 30-11                                              | BD Bioscience         | 563053           | 1:50                    |
| CD11b               | Pacific Blue        | M1/70                                              | Biolegend             | 101224           | 1:50                    |
| CD11b               | PE                  | M1/70                                              | BD Bioscience         | 557397           | 1:50                    |
| CD11b               | PerCP-Cy5.5         | M1/70                                              | BD Bioscience         | 550993           | 1:50                    |
| CD11c               | APC                 | N418                                               | eBioscience           | 17-0114-82       | 1:100                   |
| CD31                | BV421               | 390                                                | Biolegend             | 102424           | 1:100                   |
| Podoplanin          | PeCy7               | 8.1.1                                              | Biolegend             | 127412           | 1:100                   |
| Ly6G                | PeCy7               | 1A8                                                | BD Bioscience         | 560601           | 1:100                   |
| Ly6G                | FITC                | 1A8                                                | BD Bioscience         | 551460           | 1:100                   |
| Ly6C                | FITC                | AL-21                                              | BD Bioscience         | 553104           | 1:100                   |
| Ly6C                | PE                  | AL-21                                              | BD Bioscience         | 560592           | 1:59                    |
| F4/80               | PE                  | Cl:A3-1                                            | AbD Serotec           | MCA497PE         | 1:50                    |
| Gr-1                | APC                 | RB6-8C5                                            | BD Bioscience         | 553129           | 1:50                    |
| CCR2                |                     | Purified                                           | Gift<br>Matthias Mack |                  | 1:370                   |
| anti-rat<br>IgG2b   | Biotin              | G15-337                                            | BD Bioscience         | 553883           | 1:50                    |
| Streptavidin        | PE                  |                                                    | BD Bioscience         | 554061           | 1:50                    |
| Streptavidin        | eF450               |                                                    | eBioscience           | 48-4317-82       | 1:50                    |
| CXCR4               | PE                  | 2B11                                               | eBioscience           | 12-9991-82       | 1:25                    |
| Sca-1               | PeCy7               | D7                                                 | eBioscience           | 25-5981-82       | 1:100                   |
| c-Kit               | APC-<br>eFluor780   | 2B8                                                | eBioscience           | 47-1172-82       | 1:100                   |
| CD34                | FITC                | RAM34                                              | BD Bioscience         | 553733           | 1:100                   |
| FcγRII/III          | PerCP-Cy5.5         | 93                                                 | eBioscience           | 45-0161-82       | 1:100                   |
| Lineage<br>cocktail | eFluor 450          | 17A2,<br>RA3-6B2,<br>M1/70,<br>TER-119,<br>RB6-8C5 | eBioscience           | 88-7772-72       | 1:5                     |

**Supplementary Table 2: List of Taqman probes for qPCR.**

| <b>Gene name</b> | <b>Host</b> | <b>Code</b>    |
|------------------|-------------|----------------|
| Ackr2            | Murine      | Mm_00445551_m1 |
| Ccr1             | Murine      | Mm01216147_m1  |
| Ccr2             | Murine      | Mm_00438270_m1 |
| Ccr5             | Murine      | Mm04207879_m1  |
| Cxcr4            | Murine      | Mm_01292123_m1 |
| Vegfa            | Murine      | Mm00437306_m1  |
| Tnf- $\alpha$    | Murine      | Mm00443258_m1  |
| Alox5            | Murine      | Mm01182747_m1  |
| Arg1             | Murine      | Mm_00475988_m1 |
| Gapdh            | Murine      | Mm99999915_g1  |
| $\beta$ -actin   | Murine      | Mm_00607939_s1 |
| ACKR2            | Human       | Hs_00174299_m1 |
| CCR2             | Human       | Hs00704702_s1  |
| CXCR4            | Human       | Hs_00607978_s1 |
| CD11b            | Human       | Hs_00355885_m1 |
| GAPDH            | Human       | Hs_99999905_m1 |

**Supplementary Table 3: Metastasis score of *NeuT/Ackr2<sup>+/+</sup>*, *NeuT/Ackr2<sup>-/-</sup>* mice and Balb/c mice orthotopically injected with 4T1 cells and treated as indicated. The metastasis score was calculated as described in the Material and Methods section (MR = metastatic ratio = *Ackr2<sup>-/-</sup>* metastasis score / WT metastasis score).**

| MODEL              | FIGURE | WT   |     |    | <i>Ackr2<sup>-/-</sup></i> |     |    | MR   |
|--------------------|--------|------|-----|----|----------------------------|-----|----|------|
|                    |        | Mean | SD  | n  | Mean                       | SD  | n  |      |
| NeuT               | 1C     | 33.1 | 1.0 | 26 | 17                         | 5.6 | 16 | 0.51 |
| 4T1                | 1F     | 13.5 | 1.0 | 14 | 5.3                        | 2.3 | 13 | 0.17 |
| 4T1 66cl4          | 1F     | 7    | 1.8 | 4  | 8.8                        | 5.6 | 4  | 1.26 |
| 4T1 IgG            | 4C     | 14.0 | 4.0 | 3  | 3.3                        | 1.5 | 5  | 0.24 |
| 4T1 $\alpha$ -Ly6G | 4C     | 2.3  | 0.6 | 3  | 7.7                        | 3.5 | 3  | 3.35 |

**Supplementary Table 4: Number of metastasis in WT and *Ackr2<sup>-/-</sup>* mice i.v. injected with B16F10 cells and treated as indicated (MR = metastatic ratio = *Ackr2<sup>-/-</sup>* metastasis number / WT metastasis number).**

| Treatment       | FIGURE | WT    |      |    | <i>Ackr2<sup>-/-</sup></i> |      |   | MR   |
|-----------------|--------|-------|------|----|----------------------------|------|---|------|
|                 |        | Mean  | SD   | n  | Mean                       | SD   | n |      |
| -               | 4A     | 235.1 | 62.3 | 14 | 102.8                      | 54.3 | 8 | 0.41 |
| IgG             | 4B     | 92.0  | 38.4 | 6  | 28.7                       | 5.0  | 3 | 0.31 |
| $\alpha$ -Ly6G  | 4B     | 28.0  | 17.4 | 5  | 74.5                       | 44.7 | 4 | 2.66 |
| IgG             | S4A    | 157.6 | 42.3 | 5  | 72.8                       | 44.3 | 6 | 0.46 |
| $\alpha$ -CD115 | S4A    | 38.2  | 13.8 | 5  | 34.8                       | 24.8 | 5 | 0.91 |
| IgG             | S4B    | 75.0  | 20.0 | 4  | 17.0                       | 13.0 | 3 | 0.23 |
| $\alpha$ -CD20  | S4B    | 52.2  | 28.3 | 6  | 10.3                       | 5.5  | 3 | 0.20 |

**Supplementary Table 5: Number of metastasis in WT mice i.v. injected with B16F10 cells and adoptively transferred with neutrophils of the indicated genotype.**

| FIGURE | PBS   |      |   | WT neutrophils |      |   | <i>Ackr2<sup>-/-</sup></i> neutrophils |      |   |
|--------|-------|------|---|----------------|------|---|----------------------------------------|------|---|
|        | Mean  | SD   | n | Mean           | SD   | n | Mean                                   | SD   | N |
| 4D     | 230.8 | 36.3 | 5 | 245.4          | 31.7 | 9 | 94.3                                   | 57.4 | 8 |
